# Supplementary material for: Defining the Basal and Immunomodulatory Mediator-Induced Phosphoprotein Signature in Pediatric B Cell Acute Lymphoblastic Leukemia (B-ALL) Diagnostic Samples
Source: Int J Mol Sci. 2023 Sep 11;24(18):13937. doi: 10.3390/ijms241813937 (PMC10531382; doi:10.3390/ijms241813937)
Supplement: Supplementary file 1 [file ijms-24-13937-s001.zip]

Archive with 10 entries (10 files):
- Figure S1.pdf
- Figure S2.tif
- Figure S3.tif
- Figure S4.tif
- Figure S5.tif
- Figure S6.tif
- Figure S7.tif
- Supplementary Legends.pdf
- Table S1.xlsx
- Table S2.xlsx
