# Supplementary material for: Defining the Basal and Immunomodulatory Mediator-Induced Phosphoprotein Signature in Pediatric B Cell Acute Lymphoblastic Leukemia (B-ALL) Diagnostic Samples
Source: Int J Mol Sci. 2023 Sep 11;24(18):13937. doi: 10.3390/ijms241813937 (PMC10531382; doi:10.3390/ijms241813937)
Supplement: Supplementary file 1 [file ijms-24-13937-s001.zip › Table S1.xlsx]

## Sheet: Sheet1
	Study Subject	Gender	Age at Diagnosis (Dx)	WBC count at diagnosis (Dx) (103/uL)	Risk Category at Diagnosis (Dx)	Cytogenetics/FISH data	Other
	1	M	7y7m	35.82	Standard Risk	Hyperdiploidy
	2	F	3y4m	34.27	Standard Risk	Hyperdiploidy
	3*	M	16y12m	41.87	Very High Risk	Dx sample: un-analyzable; Minimal residual disease (MRD) sample: Normal male karyotype
	4	F	10y9m	17.45	High Risk	E2A-PBX1 (TCF3-PBX1) re-arrangement
	5	F	2y3m	8.4	Standard Risk	TEL-AML1 (ETV6-RUNX1) re-arrangement
	6	F	2y12m	9.29	Standard Risk	Hyperdiploidy
	7	F	4y7m	3.47	Standard Risk	Hyperdiploidy	Lost to follow up
	8	F	10y1m	9.06	High Risk	46,XX,der(14)ins(14;?)(q32;?)[8]//rearrangement of IGH in 65% of cells	Transplanted
	9§	F	1y3m	13.28	High Risk	BCR-ABL1 translocation	Transplanted
	10	F	6y1m	8.09	High Risk	BCR-ABL1 translocation
	11	F	5y12m	10.23	Not known	Loss of material from the short arm of chromosome 12 and gain of chromosome 21	Transferred care out-of-state
	12	F	1y9m	14.98	Standard Risk	Hyperdiploidy
	13†*§	M	13y5m	0.8	Not known	Tetraploid population in 7-13% of cells analyzed: unclear significance	Developed secondary HLH
	14§	M	2y3m	1.92	Standard Risk	Hyperdiploidy
	15	F	2y12m	68.71	Standard Risk	Hyperdiploidy
	16*	M	0y11m	48.74	High Risk (Infant ALL)	t(11;19)(q23;p13.3);MLL (KMT2A) locus (11q23) re-arrangement
	17*	M	1y5m	7.71	Standard Risk	der(19)t(1;19): associated with precursor B-ALL
	18	F	7y8m	32.2	Standard Risk	der(19)t(1;19): associated with precursor B-ALL;E2A (TFTP/TCF3) locus re-arrangement
	19	F	5y2m	83.57	High Risk (due to ↑ WBC count at Dx)	t(12;21)(p12;q22);ETV6(TEL)/RUNX1(AML1) fusion
	20§	M	18y9m	0.51	Very High Risk	der(9)t(9;9);three copies of ABL1 were detected; no BCR-ABL1 fusion.
	21	M	17y6m	17.53	Very High Risk	Abnormal mosaic male karyotype; 24%:↑chromosome 4 and 10; 85%:↑ chromosome 21
	22§	M	14y7m	15.98	Very High Risk	del(7)(q22q32)[10]
	23	F	4y7m	3.04	Standard Risk	del(9)(p21p24),+21[8];three copies of AML1 were detected; no TEL-AML1 fusion
	24	F	5y5m	9.2	Standard Risk	t(12;21)(p12;q22);ETV6(TEL)/RUNX1 (AML1) fusion detected;Atypical hyperdiplody
	25§	M	10y4m	1.65	High Risk (due to age)	Hyperdiploidy
	26	M	2y6m	20.46	Standard Risk	Hyperdiploidy	In remission, but lost to follow up after 2016.
	27	F	2y4m	33.06	Standard	Hyperdiploidy
	28	M	2y4m	3.75	Standard Risk	t(12;21)(p12;q22);TEL/AML1 [t(12;21), ETV6/RUNX1)] fusion detected
	29	F	3y10m	5.67	Standard Risk	dic(9;20)(p12;q11.2)[7]
	30§	M	10y11m	2.79	High Risk (due to age)	Hyperdiploidy (+4,+9,+10,+17,+21,+21) in approximately 50% of cells
	31	M	2y11m	14.15	Standard Risk	t(12;21)(p12;q22);TEL/AML1 [t(12;21), ETV6/RUNX1)] fusion detected
	32	M	2y10m	8.16	Standard Risk	Hyperdiploidy
	33	M	2y11m	52.14	High Risk (due to ↑ WBC count at Dx)	t(12;21)(p12;q22); ETV6/RUNX1 fusion
	34	M	13y9m	3.9	Very High Risk	46,XY,del(1)(q31q44),t(3;3)(q21;q29)[1]: Non clonal abnormality:?technical artefact	Transplanted
	35	M	17y10m	14.31	Very High Risk	Atypical hyperdiploidy
	36§	M	18y4m	7.12	Very High Risk	Inadequate for complete cytogenetic analysis; FISH: no evidence of ETV6-RUNX1 or BCR-ABL1 fusion or MLL re-arrangement	Transplanted
	37§	M	2y5m	1.68	Standard Risk	Inadequate for cytogenetic analysis; FISH: highly suggestive of hyperdiploidy
	38*	F	10y3m	10.45	High Risk (due to age)	iAMP21
	39	M	8y3m	1.48	Standard Risk	Atypical hyperdiploidy
	40	M	2y4m	17.03	Very High Risk (due to CNS involvement)	FISH: aneuploidy was detected:four copies of AML1 (RUNX1), and three copies of the centromere of chromosome 17
	41	F	2y0m	17.42	Standard Risk	Hyperdiploidy (gain of chromosomes 4 and 10 is associated with a relatively good prognosis)
	42	M	9y0m	11.35	High Risk	Atypical hyperdiploidy
	43	M	21y1m	15.25	Not known	The loss of material from the short arm of chromosome 9 [del(9p)] is a recurring abnormality in pecursor B-ALL	Records restricted
	44*	M	4y0m	3.58	Standard Risk	Atypical hyperdiploidy
	45	M	2y8m	1.71	Standard Risk	Hyperdiploidy
	46§	M	6y6m	2.11	Standard Risk	Inadequate for cytogenetic analysis; FISH analysis was positive for a ETV6/RUNX1 fusion;aneuploid/tetraploid state
	47†	F	14y8m	30.04	Very High Risk	Near-haploidy/low hypodiploidy; one TP53 mutation (c.524G>A;p.R175H)
	48†	F	14y8m	31.99	Very High Risk	t(9;22); FISH: BCR-ABL1 fusion detected and iAMP21 positive (5 or 6 copies of RUNX1 detected)
	49	M	15y11m	3.92	Very High Risk (due to age)	Hyperdiploidy
	50†*	M	0y5m	4.67	High Risk (Infant ALL)	The t(1;11) results in rearrangement of the MLL gene (KMT2A) at 11q23
	51	M	1y8m	13.08	Standard Risk	ETV6/RUNX1 fusion detected [t(12;21)(p12;q22)]
	52	M	16y8m	2.96	Very High Risk (due to age)	Near-haploidy/low hypodiploidy + second hyperdiploid line (?duplication of the near-haploid stemline)
	53	M	3y7m	39.26	Standard Risk	dic(7;12): Loss of 12p (ETV6)
	54	M	21y9m	22.46	Very High Risk (due to age)	clone 1 46,XY,add(5)(p15),add(7)(p21)[11] : use to monitor disease
	55	F	21y8m	1.93	Very High Risk (due to age)	i(7)(q10): loss of 7p material and gain of 7q (use to monitor disease)	Transplanted
	56	M	3y7m	13.17	Standard Risk	Hyperdiploidy
	57	F	2y2m	24.75	Very High Risk (CNS3+ Disease At Dx)	Hyperdiploidy
	58	M	3y2m	2.42	Standard Risk	positive for a ETV6(TEL)/RUNX1(AML1) fusion
	59	M	2y9m	17.73	Very High Risk (CNS3+ Disease At Dx)	clone 1 46,XY,del(1)(q24q44),t(4;14)(p14;q11.2),+del(6)(q13q23),-12, add(18)(q11.2)[15] (use to monitor disease)
	60	M	17y6m	28.06	Very High Risk (due to age)	Atypical hyperdiploidy (use to monitor disease)
	61	F	1y7m	263.9	High Risk (due to ↑ WBC count at Dx)	recurring dic(9;20):concurrent loss of chromosome 9 and 9p and loss of chromosome 20: FISH: 2 copies of ABL1
	62	M	2y3m	11.24	Standard Risk	Hyperdiploidy
	63	F	7y0m	18.87	Standard Risk	positive for a ETV6/RUNX1 fusion
	†Deceased
	*Relapsed
	HLH: Hemophagocytic lymphohistiocytosis
	§ Bone marrow sample
