# Supplementary material for: Defining the Basal and Immunomodulatory Mediator-Induced Phosphoprotein Signature in Pediatric B Cell Acute Lymphoblastic Leukemia (B-ALL) Diagnostic Samples
Source: Int J Mol Sci. 2023 Sep 11;24(18):13937. doi: 10.3390/ijms241813937 (PMC10531382; doi:10.3390/ijms241813937)
Supplement: Supplementary file 1 [file ijms-24-13937-s001.zip › Table S2.xlsx]

## Sheet: B-ALL Blasts
		pSTAT1				pSTAT5				pSTAT6				pSTAT5				pSTAT3						p65-NFkB
	A. Clinical Subtype: Hyperdiploidy	PBS	IFNγ	Fold Change		PBS	IL-2	Fold Change		PBS	IL-4	Fold Change		PBS	IL-7	Fold Change		PBS	IL-10	Fold Change	IL-21	Fold Change		PBS	CD40L	Fold Change
	Study Subject
	1	132.683	519.78	3.91746		242.086	255.661	1.05608		136.591	463.789	3.39546		242.086	568.306	2.34754		159.3	238.59	1.49774	Not Done	Not Done		236.463	309.64	1.30946
	2	120.751	856.844	7.09597		202.059	195.805	0.969046		99.2999	172.504	1.7372		202.059	426.171	2.10914		119.29	176.075	1.47602	Not Done	Not Done		156.685	260.163	1.66042
	6	247.328	982.064	3.97069		550.02	606.284	1.1023		164.284	282.442	1.71923		Not Done	Not Done	Not Done		230.257	282.025	1.22483	Not Done	Not Done		201.258	215.624	1.07138
	7	247.989	733.961	2.95966		423.215	377.989	0.893135		188.147	201.017	1.06841		423.215	496.756	1.17377		243.107	298.724	1.22878	Not Done	Not Done		288.038	410.341	1.4246
	12	132.094	506.757	3.83634		238.783	233.335	0.977188		128.937	160.172	1.24225		238.783	247.877	1.03809		142.463	174.51	1.22495	Not Done	Not Done		177.404	450.791	2.54105
	14§	154.98	547.35	3.53175		228.78	222.63	0.973118		170.97	241.08	1.41007		228.78	255.84	1.11828		146.37	314.88	2.15126	Not Done	Not Done		220.17	397.29	1.80447
	15	156.09	458.59	2.93798		242	268.62	1.11		131.89	150.04	1.13761		242	249.26	1.03		133.1	154.88	1.16364	Not Done	Not Done		158.51	164.56	1.03817
	25§	218.96	1273.3	5.81522		329.63	318.92	0.967509		133.28	229.67	1.72321		329.63	345.1	1.04693		171.36	227.29	1.32639	186.83	1.09028		223.72	396.27	1.77128
	26	109.308	947.144	8.66493		276.052	278.595	1.00921		92.8174	248.071	2.67268		276.052	559.125	2.02543		129.982	218.671	1.68231	453.334	3.48766		187.384	348.422	1.8594
	27	212.852	645.7	3.03356		233.932	217.536	0.929913		148.55	203.501	1.36992		233.932	297.068	1.26989		113.428	140.283	1.23675	132.109	1.16469		160.21	189.443	1.18247
	30§	99.76	218.08	2.18605		302.76	252.88	0.835249		114.84	203	1.76768		302.76	277.24	0.915709		148.48	213.44	1.4375	190.24	1.28125		145	158.92	1.096
	32	114.23	712.41	6.23663		222.96	247.66	1.11078		105.6	214.51	2.03134		222.96	485.83	2.179		145.35	186.85	1.28552	373.13	2.56711		171.23	297.3	1.73626
	35	141.56	146.83	1.03723		262.7	263.61	1.00346		143.07	149.34	1.04382		262.7	252.88	0.962619		144.12	147.95	1.02658	146.27	1.01492		167.5	170.75	1.0194
	37§	184.25	1086.63	6.41026		292.925	300.64	1.02634		174.24	193.025	1.10781		292.925	433.09	1.4785		186.9	209.7	1.12199	214.685	1.14866		455.02	554.44	1.2185
	39	203.88	500.08	2.45282		359.66	331.54	0.921815		182.08	194.74	1.06953		359.66	455.73	1.26711		164.17	162.78	0.991533	170.75	1.04008		245.31	263.73	1.07509
	41	134.6	540.68	4.01694		344.08	342.96	0.996745		121.47	295.61	2.43361		344.08	793.43	2.30595		125.54	181.99	1.44966	188.31	1.5		248.44	309.97	1.24767
	42	187.58	369.16	1.96801		378.83	359.59	0.949212		168.32	216.73	1.28761		378.83	438.13	1.15653		166	159.08	0.958313	192.57	1.16006		239.26	272.8	1.14018
	44*	140.97	731.1	5.18621		309.71	301.15	0.972361		129.81	216.35	1.66667		309.71	664.65	2.14604		153.15	168.93	1.10304	212.78	1.38936		244.36	389.89	1.59556
	45	184.65	808.18	4.37682		398.15	377.19	0.947357		162.36	233.12	1.43582		398.15	518.64	1.30262		171.49	226.52	1.32089	267.14	1.55776		318.22	397.49	1.2491
	49	156	309.4	1.98333		336.7	334.1	0.992278		122.2	188.5	1.54255		336.7	555.1	1.64865		171.6	174.2	1.01515	184.6	1.07576		273	543.4	1.99048
	56	131.169	453.447	3.45696		347.728	344.785	0.991535		118.614	200.691	1.69197		347.728	632.996	1.82037		132.575	187.34	1.41309	205.955	1.5535		165.087	227.88	1.38037
	57	164.112	720.558	4.39064		443.09	440.447	0.994035		143.455	165.285	1.15218		443.09	535.836	1.20932		162.871	169.267	1.03927	175.749	1.07907		253.509	678.641	2.67699
	60	221.964	577.534	2.60193		985.41	1575.94	1.59927		201.747	332.366	1.64744		985.41	2623.53	2.66237		214.215	285.13	1.33105	850.02	3.96806		245.106	447.782	1.82689
	62	165.258	1371.54	8.29938		469.925	406.956	0.866		205.801	277.838	1.35003		469.925	1055.81	2.24676		1259.61	1636.11	1.2989	1735.55	1.37785		281.589	612.876	2.17649
	B. Clinical Subtype:t(12;21) translocation
	Study Subject
	5	94.5999	189.009	1.98141		197.115	197.557	1.00224		80.593	104.626	1.2982		Not Done	Not Done	Not Done		83.7566	95.7181	1.14281	Not Done	Not Done		121.848	559.836	4.59453
	19	93.6	259.2	2.76923		218.4	224.4	1.02747		94.8	92.4	0.974684		218.4	271.2	1.24176		88.8	92.4	1.04054	Not Done	Not Done		181.2	1056	5.82781
	24	156.703	362.436	2.31289		210.445	216.13	1.02702		90.8713	95.3292	1.04906		210.445	220.927	1.04981		108.133	114.606	1.05986	114.587	1.05968		163.428	380.761	2.32984
	28	238.236	191.901	0.80551		287.262	275.754	0.959937		178.846	218.028	1.21908		287.262	471.469	1.64125		127.209	134.175	1.05476	168.492	1.32454		203.83	415.07	2.03635
	31	85.7646	178.377	2.07984		201.978	185.226	0.917064		82.3228	121.731	1.47871		201.978	527.51	2.61172		95.8866	100.209	1.04508	110.616	1.15361		154.634	442.636	2.86248
	33	60.95	221.06	3.62691		143.93	166.05	1.15369		57.84	105.91	1.83109		143.93	266.2	1.84951		63.08	70.09	1.11113	101.3	1.6059		140.4	405.81	2.89038
	46§	218.69	396.82	1.81453		457.07	450.48	0.985582		201.62	279	1.38379		457.07	485.95	1.06319		200.37	187.22	0.934371	213.45	1.06528		336.59	1047.91	3.11331
	51	107.31	268.48	2.50191		290.76	301.29	1.03622		94.29	140.11	1.48595		290.76	514.74	1.77033		128.31	127.03	0.990024	159.71	1.24472		235.75	753.18	3.19483
	58	127.934	239.386	1.87117		349.548	300.799	0.860536		127.88	131.94	1.03174		349.548	356.248	1.01917		137.181	138.402	1.00891	139.812	1.01918		223.02	447.392	2.00607
	63	136.67	570.663	4.17547		375.38	375.236	0.999616		161.639	192.972	1.19385		375.38	1655.06	4.40903		1236.22	1348.44	1.09078	1310.02	1.05971		307.171	852.508	2.77535
	C. Clinical Subtype:t(1;19) translocation
	Study Subject
	4	144.164	204.667	1.41968		203.694	197.264	0.968435		94.7555	121.848	1.28592		Not Done	Not Done	Not Done		103.668	101.431	0.978417	Not Done	Not Done		114.915	114.102	0.992925
	17*	178.102	374.868	2.1048		310.965	309.656	0.995792		158.482	202.607	1.27842		310.965	329.289	1.05893		125.605	150.831	1.20084	Not Done	Not Done		239.404	223.63	0.934109
	18	141.6	201	1.42032		235.8	267	1.13232		99.6	141.6	1.42169		235.8	280.8	1.19084		92.4	115.8	1.25325	Not Done	Not Done		128.4	155.4	1.21028
	D. Clinical Subtype: Hypodiploidy
	Study Subject
	47†	346.1	1270.2	3.67004		485.08	439.34	0.905706		209.19	311.28	1.48803		485.08	2295.46	4.73213		265.03	258.48	0.975286	418.34	1.57846		341.43	376.76	1.10348
	52	174.23	605.22	3.47368		335.36	Not Done	Not Done		121.83	197.15	1.61824		335.36	658.27	1.96288		204.36	238.42	1.16667	483.39	2.36538		200.43	180.78	0.901961
	D. Clinical Subtype: t(9;22) translocation
	Study Subject
	9§	107.01	247.23	2.31034		362.85	345.63	0.952542		88.56	94.71	1.06944		362.85	398.52	1.09831		103.32	151.29	1.46429	Not Done	Not Done		116.85	124.23	1.06316
	10	95.9581	221.006	2.30315		400.18	402.55	1.00592		93.6793	167.963	1.79296		400.18	406.735	1.01638		108.991	123.726	1.13519	Not Done	Not Done		163.414	352.509	2.15715
	48†	169.04	513.09	3.03532		988.93	996.53	1.00769		139.17	331.33	2.38076		988.93	1844.75	1.8654		162.61	191.5	1.17766	489.95	3.01304		293.09	408.74	1.39459
	E. Clinical Subtype: Other‡
	Study Subject
	3*	84.5071	168.044	1.98852		262.851	375.353	1.42801		66.9287	124.838	1.86524		Not Done	Not Done	Not Done		97.4764	112.967	1.15892	Not Done	Not Done		110.235	494.062	4.48188
	8	104.326	537.775	5.15477		224.218	222.863	0.993955		109.856	266.352	2.42455		224.218	214.057	0.954684		115.195	145.886	1.26643	Not Done	Not Done		113.476	120.951	1.06588
	11	94.7645	138.667	1.46328		241.649	240.997	0.997305		114.831	133.63	1.16371		241.649	264.061	1.09275		101.63	103.27	1.01613	Not Done	Not Done		129.245	191.838	1.4843
	13†*§	180.064	273.365	1.51816		318.75	325.458	1.02104		180.882	202.481	1.11941		318.75	322.793	1.01268		162.678	156.333	0.960999	Not Done	Not Done		231.15	250.013	1.0816
	16*	105.27	306.13	2.90805		186.34	192.39	1.03247		83.49	101.64	1.21739		186.34	206.91	1.11039		93.17	146.41	1.57143	Not Done	Not Done		154.88	229.9	1.48438
	20§	274.81	344.422	1.25331		471.611	381.524	0.808979		159.568	185.877	1.16488		471.611	405.686	0.860214		178.055	156.515	0.879023	Not Done	Not Done		284.634	246.367	0.865554
	21	188.76	919.6	4.87179		458.59	465.85	1.01583		130.68	318.23	2.43519		458.59	1531.86	3.34037		146.41	233.53	1.59504	262.57	1.79339		163.35	193.6	1.18519
	22§	157.923	717.659	4.56558		302.592	299.9	0.991102		120.167	148.412	1.23505		302.592	289.401	0.956405		146.85	256.819	1.74886	158.987	1.08265		258.462	409.079	1.58274
	23	166.669	568.243	3.40989		365.139	337.511	0.924337		107.106	222.866	2.0808		365.139	394.074	1.07924		134.856	152.32	1.1295	144.464	1.07125		212.189	293.004	1.38086
	29	91.9683	199.522	2.16737		203.922	226.631	1.11136		80.8449	117.859	1.45785		203.922	381.193	1.86931		97.1842	106.306	1.09386	110.709	1.13917		133.539	188.593	1.41227
	34	182.16	224.4	1.23188		454.08	382.8	0.843023		161.04	162.36	1.0082		454.08	396	0.872093		167.64	200.64	1.19685	167.64	1		249.48	253.44	1.01587
	36§	103.78	160.515	1.54425		191.265	213.765	1.11764		98.89	166.295	1.68162		191.265	163.66	0.855671		123.05	120.81	0.981796	110.65	0.899228		147.92	140.685	0.951088
	38*	126.5	501.48	3.96427		336.37	321.97	0.95719		134.45	203.08	1.51045		336.37	527.82	1.56916		158.06	176.64	1.11755	323.19	2.04473		228.22	609.54	2.67084
	40	172.92	248.9	1.43939		351.08	404.79	1.15299		163.75	210.91	1.288		351.08	449.33	1.27985		153.27	180.78	1.17949	168.99	1.10256		193.88	246.28	1.27027
	43	138.23	310.96	2.24958		319.09	308.11	0.96559		132.85	164.86	1.24095		319.09	308.43	0.966592		138.34	173.42	1.25358	143	1.03369		148.97	179.55	1.20528
	50†*	205.8	421.63	2.04874		421.42	417.96	0.99179		154.14	383.39	2.48728		421.42	505.47	1.19944		237.26	301.86	1.27228	274.23	1.15582		406.56	658.18	1.6189
	53	106.04	276.338	2.60597		259.324	221.293	0.853347		102.122	129.555	1.26863		259.324	1456.68	5.61721		109.979	100.685	0.915492	119.134	1.08324		250.089	370.568	1.48174
	54	155.459	381.992	2.45719		434.402	418.652	0.963742		135.334	215.282	1.59075		434.402	470.605	1.08334		141.006	218.08	1.5466	175.06	1.24151		211.766	481.579	2.27411
	55	174.687	354.732	2.03067		601.735	552.386	0.917988		172.751	320.959	1.85793		601.735	769.435	1.27869		190.823	202.653	1.062	618.687	3.2422		226.095	223.425	0.988191
	59	162.373	210.822	1.29838		297.333	322.072	1.0832		138.38	248.651	1.79687		297.333	538.246	1.81024		1963	2247.7	1.14503	2156.7	1.09868		235.668	265.862	1.12812
	61	112.686	806.952	7.16108		259.457	261.091	1.0063		100.71	261.399	2.59557		259.457	862.373	3.32376		1273.17	1193.13	0.937135	1210.11	0.950469		247.958	250.812	1.01151
	†Deceased
	*Relapsed
	§ Bone marrow sample
	‡ Please refer to Supplementary Table 1 for study subject-specific Cytogenetics/FISH data

## Sheet: Mature B cells
		pSTAT1				pSTAT5				pSTAT6				pSTAT5				pSTAT3						p65-NFkB
	A. Clinical Subtype: Hyperdiploidy	PBS	IFNγ	Fold Change		PBS	IL-2	Fold Change		PBS	IL-4	Fold Change		PBS	IL-7	Fold Change		PBS	IL-10	Fold Change	IL-21	Fold Change		PBS	CD40L	Fold Change
	Study Subject
	1	60.9908	266.232	4.36512		105.433	116.938	1.10912		61.2543	321.042	5.24114		105.433	107.727	1.02176		66.6819	602.613	9.03714	Not Done	Not Done		100.911	830.193	8.22702
	2	118.792	452.441	3.80869		184.101	174.938	0.950227		95.4348	349.257	3.65963		184.101	183.208	0.995149		110.676	612.001	5.52966	Not Done	Not Done		138.283	785.715	5.68194
	6	125.515	251.137	2.00085		333.733	351.245	1.05247		100.321	382.516	3.81291		Not Done	Not Done	Not Done		122.094	281.017	2.30165	Not Done	Not Done		134.582	388.758	2.88863
	7	130.589	488.479	3.74059		240.627	231.081	0.960326		110.22	375.119	3.40338		240.627	247.055	1.02671		132.608	414.248	3.12386	Not Done	Not Done		204.056	946.41	4.63799
	12	118.138	330.485	2.79745		203.599	203.53	0.999661		107.217	385.399	3.59459		203.599	187.763	0.922222		134.038	310.862	2.31921	Not Done	Not Done		151.145	1099.05	7.27153
	14§	119.31	496.92	4.16495		174.66	169.74	0.971831		136.53	309.96	2.27027		174.66	161.13	0.922535		104.55	386.22	3.69412	Not Done	Not Done		198.03	771.21	3.89441
	15	68.97	235.95	3.42105		131.285	148.83	1.13364		68.97	346.665	5.02632		131.285	129.47	0.986175		72.6	251.68	3.46667	Not Done	Not Done		94.38	252.89	2.67949
	25§	155.89	628.32	4.03053		254.66	242.76	0.953271		97.58	352.24	3.60976		254.66	247.52	0.971963		121.38	326.655	2.69118	227.29	1.87255		204.68	412.335	2.01453
	26	102.548	372.833	3.63569		237.558	236.082	0.993788		87.6427	472.264	5.38852		237.558	226.463	0.953297		105.297	722.258	6.85924	945.16	8.97612		160.866	1030.76	6.40757
	27	137.295	277.89	2.02403		160.86	158.21	0.983523		101.178	355.102	3.50967		160.86	180.623	1.12286		76.4389	290.61	3.80186	441.295	5.77318		125.697	371.293	2.95388
	30§	84.68	257.52	3.0411		244.76	201.84	0.824645		95.12	249.4	2.62195		244.76	200.68	0.819905		112.52	472.12	4.19588	212.28	1.8866		133.4	313.2	2.34783
	32	79.64	262.1	3.29106		150.64	168.5	1.11856		74.81	343.23	4.58802		150.64	167.24	1.1102		88.87	370.07	4.16417	508.1	5.71734		111.52	570.34	5.11424
	35	71.45	84.55	1.18334		138.46	137	0.989455		71.39	122.59	1.71719		138.46	127.6	0.921566		71.34	89.35	1.25245	93.73	1.31385		98.87	109.44	1.10691
	37§	111.23	1040.52	9.35467		182.81	199.24	1.08987		100.28	468.43	4.67122		182.81	195.4	1.06887		108.81	666.64	6.12664	376.16	3.45704		264.57	1130.71	4.27376
	39	137.12	311.29	2.2702		261.95	227.64	0.869021		134.77	277.65	2.06018		261.95	216.02	0.824661		128.66	368.28	2.86243	256.63	1.99464		181.98	1198.5	6.58589
	41	117.88	340.55	2.88895		282.91	276.36	0.976848		106.07	484.68	4.56944		282.91	289.48	1.02322		115.24	488.61	4.23993	664.12	5.76293		195.18	1168.51	5.98683
	42	165.39	368.33	2.22704		322.67	319.32	0.989618		142.39	345.06	2.42334		322.67	317.56	0.984163		142.44	473.1	3.3214	361.89	2.54065		213.16	687.14	3.22359
	44*	127.2	339.05	2.66549		210.22	203.82	0.969556		111.43	419.63	3.76586		210.22	207.57	0.987394		107.56	385.67	3.58563	313.1	2.91093		221.9	1104.77	4.97868
	45	146.91	486.65	3.31257		313.55	292.26	0.9321		127.76	567.72	4.44364		313.55	308.5	0.983894		130.23	565.03	4.33871	653.96	5.02158		220.39	1197.61	5.43405
	49	113.1	208	1.83908		249.6	244.4	0.979167		88.4	309.4	3.5		249.6	234	0.9375		115.7	360.1	3.11236	286.65	2.47753		183.3	1381.9	7.53901
	56	122.074	395.24	3.23771		308.336	301.275	0.9771		115.295	483.815	4.19631		308.336	343.717	1.11475		123.408	780.85	6.32738	800.773	6.48882		159.824	776.967	4.86138
	57	126.48	489.302	3.86861		303.997	306.204	1.00726		111.263	651.341	5.85405		303.997	303.562	0.998567		114.672	693.423	6.04703	708.109	6.1751		201.969	1536.15	7.60587
	60	137.75	318.431	2.31166		311.935	317.13	1.01666		126.001	591.446	4.69397		311.935	340.519	1.09164		119.531	547.257	4.57836	705.818	5.90488		165.008	908.652	5.50672
	62	106.366	319.975	3.00825		319.075	266.46	0.835102		137.183	506.42	3.69156		319.075	380.607	1.19285		722.762	2390.15	3.30697	3061.17	4.23538		179.061	1179.32	6.58613
	B. Clinical Subtype:t(12;21) translocation
	Study Subject
	5	91.3633	247.33	2.70711		182.056	181.889	0.999079		73.9855	194.384	2.62732		Not Done	Not Done	Not Done		78.0817	202.112	2.58847	Not Done	Not Done		124.606	832.435	6.68052
	19	85.2	310.8	3.64789		170.4	172.8	1.01408		81.6	380.4	4.66176		170.4	181.2	1.06338		75.6	427.2	5.65079	Not Done	Not Done		147.6	1222.8	8.28455
	24	124.46	388.653	3.12272		173.824	178.85	1.02892		78.6055	386.982	4.92308		173.824	175.295	1.00846		89.9317	579.978	6.44909	486.987	5.41507		124.998	803.533	6.42838
	28	228.29	249.16	1.09142		249.95	242.137	0.968742		165.585	527.215	3.18395		249.95	232.584	0.930521		120.734	456.944	3.78471	642.488	5.32151		180.198	610.779	3.38949
	31	60.6313	165.378	2.7276		123.361	112.243	0.909873		56.6173	214.232	3.78387		123.361	118.209	0.958238		69.1042	341.687	4.94452	383.426	5.54852		88.6662	508.418	5.73406
	33	47.78	172.24	3.60486		96.83	106.24	1.09718		44.44	282.67	6.36071		96.83	102.62	1.0598		50.06	296.51	5.92309	371.47	7.4205		72.65	443.42	6.10351
	46§	118.64	637.88	5.3766		231.73	214.63	0.926207		110.36	349.03	3.16265		231.73	211.41	0.912312		98.89	555.98	5.62221	177.99	1.79988		232.6	1239.85	5.3304
	51	103.7	440.87	4.2514		233.54	251.12	1.07528		89.94	532.49	5.9205		233.54	252.15	1.07969		111.86	610.76	5.46004	616.85	5.51448		186.72	998.52	5.34769
	58	140.406	234.218	1.66815		339.24	296.134	0.872934		136.347	276.559	2.02835		339.24	288.256	0.84971		134.865	300.014	2.22455	278.214	2.06291		214.289	1125.09	5.25035
	63	85.8141	269.978	3.14608		219.966	214.149	0.973559		106.017	374.031	3.52805		219.966	241.243	1.09673		654.985	2760.78	4.21503	2288.66	3.49421		176.756	1264.85	7.15589
	C. Clinical Subtype:t(1;19) translocation
	Study Subject
	4	82.5904	200.77	2.43091		125.969	124.892	0.991451		69.2168	394.85	5.70454		Not Done	Not Done	Not Done		74.8173	347.949	4.65065	Not Done	Not Done		91.3054	156.91	1.71852
	17*	106.967	303.728	2.83947		193.021	186.883	0.968201		115.572	416.884	3.60715		193.021	188.104	0.974523		95.86	274.22	2.86062	Not Done	Not Done		157.386	707.165	4.49318
	18	75.6	255.6	3.38095		138	158.4	1.14783		69.6	400.2	5.75		138	165.6	1.2		64.8	361.2	5.57407	Not Done	Not Done		86.4	304.8	3.52778
	D. Clinical Subtype: Hypodiploidy
	Study Subject
	47†	127.75	580.87	4.54693		229.39	201.57	0.878722		103.7	475.26	4.58303		229.39	223.36	0.973713		122.78	344.59	2.80656	443.44	3.61166		161.34	905.24	5.61076
	52	111.35	310.47	2.78824		233.18	Not Done	Not Done		89.08	584.26	6.55882		233.18	216.15	0.926966		116.59	355.01	3.04494	611.77	5.24719		153.27	324.22	2.11535
	D. Clinical Subtype: t(9;22) translocation
	Study Subject
	9§	68.88	332.1	4.82143		111.93	110.7	0.989011		67.65	276.75	4.09091		111.93	119.31	1.06593		71.34	469.86	6.58621	Not Done	Not Done		99.63	228.78	2.2963
	10	101.141	418.338	4.13617		190.171	188.998	0.99383		92.5486	458.529	4.95446		190.171	174.331	0.916703		120.857	407.563	3.37227	Not Done	Not Done		171.912	1226	7.13156
	48†	126.57	403.28	3.18622		234.08	218.75	0.93451		105.6	587.73	5.56563		234.08	242.51	1.03601		112.18	495.62	4.41808	514.39	4.5854		190.5	1614.5	8.47507
	E. Clinical Subtype: Other‡
	Study Subject
	3*	100.441	368.115	3.66498		140.146	146.456	1.04502		73.5355	482.73	6.56458		Not Done	Not Done	Not Done		194.223	682.49	3.51395	Not Done	Not Done		132.335	1337.47	10.1067
	8	95.9784	444.419	4.63041		169.701	175.997	1.0371		92.8517	626.279	6.74494		169.701	171.402	1.01002		100.591	371.248	3.69065	Not Done	Not Done		113.07	242.983	2.14895
	11	91.4231	260.012	2.84405		221.775	223.856	1.00938		100.252	400.237	3.99233		221.775	207.007	0.933409		90.1162	433.204	4.80717	Not Done	Not Done		129.595	977.116	7.53975
	13†*§	115.028	202.644	1.76169		207.483	218.225	1.05177		113.91	385.109	3.38083		207.483	201.492	0.971125		117.509	177.531	1.51078	Not Done	Not Done		181.109	769.041	4.24628
	16*	72.6	577.17	7.95		162.14	177.87	1.09701		77.44	329.12	4.25		162.14	175.45	1.08209		105.27	238.37	2.26437	Not Done	Not Done		133.1	771.98	5.8
	20§	168.118	319.81	1.9023		293.496	215.289	0.733533		101.768	176.752	1.73682		293.496	195.429	0.665866		108.996	175.64	1.61143	Not Done	Not Done		196.472	971.192	4.94315
	21	114.345	423.5	3.7037		254.705	272.25	1.06888		91.96	626.78	6.81579		254.705	261.36	1.02613		102.245	428.945	4.19527	315.205	3.08284		117.37	182.105	1.55155
	22§	159.137	755.473	4.74731		303.143	312.098	1.02954		141.271	294.594	2.08531		303.143	256.135	0.844931		153.7	1194.36	7.77071	395.45	2.57287		294.466	1427.5	4.84775
	23	116.349	275.834	2.37075		247.284	238.128	0.962975		80.839	228.402	2.8254		247.284	237.761	0.961491		106.181	396.871	3.73767	233.081	2.19512		194.515	1095.18	5.63033
	29	83.9132	190.863	2.27453		163.287	148.305	0.908245		68.9725	319.643	4.63436		163.287	164.404	1.00684		128.784	186.272	1.44639	607.145	4.71443		148.271	584.178	3.93994
	34	142.56	254.76	1.78704		333.96	279.84	0.837945		125.4	301.62	2.40526		333.96	290.4	0.869565		145.2	262.68	1.80909	250.8	1.72727		215.16	580.8	2.69939
	36§	118.03	316.47	2.68127		198.39	178.86	0.901558		108.4	385.01	3.55175		198.39	170.6	0.859922		194.84	540.4	2.77356	261.29	1.34105		165.96	234.34	1.41203
	38*	124.56	405.56	3.25594		238.06	236.88	0.995043		123.09	480.35	3.90243		238.06	252.72	1.06158		119.38	758.11	6.35039	525.8	4.40442		207.72	1306.07	6.28765
	40	142.79	238.42	1.66972		276.41	307.85	1.11374		127.07	412.65	3.24742		276.41	289.51	1.04739		115.28	389.07	3.375	306.54	2.65909		183.4	1032.28	5.62857
	43	141.45	344.71	2.43697		292.58	288.45	0.985884		126.84	434.32	3.42416		292.58	280.31	0.958063		132.45	668.23	5.04515	463.12	3.49656		172.02	455.12	2.64574
	50†*	127.19	593.89	4.66931		246.47	236.56	0.959792		93.45	341.79	3.65746		246.47	318.46	1.29208		127.79	399.63	3.12724	415.24	3.24939		259.23	951.71	3.6713
	53	81.6155	307.323	3.7655		185.104	156.579	0.8459		80.6586	355.465	4.40703		185.104	185.239	1.00073		84.591	454.054	5.36764	438.211	5.18035		196.054	1115.23	5.68836
	54	115.646	355.117	3.07072		309.654	300.331	0.969892		108.973	647.437	5.94125		309.654	319.86	1.03296		111.672	569.684	5.10139	633.64	5.6741		170.441	1129.66	6.62785
	55	141.765	515.133	3.63372		344.687	312.434	0.906427		135.396	570.38	4.21267		344.687	321.551	0.932876		165.514	544.947	3.29244	650.484	3.93007		227.658	541.261	2.37751
	59	111.352	356.307	3.19983		182.051	200.407	1.10083		91.6702	441.425	4.81536		182.051	196.478	1.07925		1066.65	3304.6	3.09811	3276	3.0713		150.626	973.271	6.46152
	61	66.8309	551.13	8.24663		155.222	158.254	1.01954		70.0693	463.602	6.61633		155.222	175.633	1.1315		710.824	1803.79	2.53761	2768.12	3.89424		169.827	899.287	5.29533
	†Deceased
	*Relapsed
	§ Bone marrow sample
	‡ Please refer to Supplementary Table 1 for study subject-specific Cytogenetics/FISH data

## Sheet: Mature T cells
		pSTAT1				pSTAT5				pSTAT6				pSTAT5				pSTAT3						p65-NFkB
	A. Clinical Subtype: Hyperdiploidy	PBS	IFNγ	Fold Change		PBS	IL-2	Fold Change		PBS	IL-4	Fold Change		PBS	IL-7	Fold Change		PBS	IL-10	Fold Change	IL-21	Fold Change		PBS	CD40L	Fold Change
	Study Subject
	1	74.6435	122.278	1.63816		129.77	1157.64	8.92065		64.9897	268.313	4.12854		129.77	2600.13	20.0364		155.536	1264.21	8.12804	Not Done	Not Done		121.385	130.702	1.07676
	2	102.788	163.443	1.59011		151.726	423.839	2.79345		75.5024	247.62	3.27963		151.726	1937.39	12.769		167.537	931.712	5.56124	Not Done	Not Done		112.076	120.521	1.07535
	6	148.535	208.027	1.40053		342.445	546.146	1.59484		101.308	348.032	3.43539		Not Done	Not Done	Not Done		203.38	965.06	4.74511	Not Done	Not Done		135.833	141.002	1.03806
	7	158.85	279.01	1.75644		310.65	537.47	1.73015		102.96	348.44	3.38423		310.65	3850.76	12.3958		438.96	932.82	2.12507	Not Done	Not Done		185.64	182.13	0.981092
	12	127.996	171.781	1.34208		208.49	356.069	1.70785		102.278	330.518	3.23157		208.49	3335.37	15.9978		259.752	916.147	3.527	Not Done	Not Done		168.198	174.213	1.03576
	14§	137.76	193.11	1.40179		174.66	575.025	3.29225		127.92	309.96	2.42308		174.66	2412.03	13.8099		196.8	950.175	4.82813	Not Done	Not Done		184.5	178.35	0.966667
	15	87.12	140.36	1.61111		159.72	590.48	3.69697		66.55	327.91	4.92727		159.72	2712.82	16.9848		173.03	926.86	5.35664	Not Done	Not Done		87.12	89.54	1.02778
	25§	152.32	178.5	1.17188		238	1139.43	4.7875		90.44	272.51	3.01316		238	2280.64	9.5825		148.75	905.59	6.088	831.81	5.592		157.08	136.85	0.871212
	26	92.1937	160.182	1.73745		210.67	1306.05	6.1995		68.9945	306.897	4.44813		210.67	4176.25	19.8236		172.417	1175.61	6.81845	1433.75	8.31559		148.784	139.034	0.934467
	27	139.431	168.549	1.20883		166.465	475.239	2.85489		98.5361	291.342	2.9567		166.465	2139.96	12.8553		110.259	728.747	6.6094	908.015	8.23528		119.439	117.405	0.982969
	30§	80.04	107.88	1.34783		223.88	388.6	1.73575		85.84	187.92	2.18919		223.88	1487.12	6.64249		121.8	670.48	5.50476	481.4	3.95238		113.68	117.16	1.03061
	32	76.67	130.07	1.69649		139.23	589.47	4.23379		63.84	248.45	3.89176		139.23	2529.61	18.1686		192.78	730.61	3.78986	810.91	4.2064		107.03	116.27	1.08633
	35	98.59	114.29	1.15925		177.1	262.18	1.48041		87.04	177.06	2.03424		177.1	970.03	5.4773		215.69	605.38	2.80671	656.83	3.04525		113.13	119.47	1.05604
	37§	129.44	196.12	1.51514		175.35	2748.73	15.6757		94.09	324.68	3.45074		175.35	2946.52	16.8036		177.86	932.34	5.24199	899.7	5.05847		281.59	265.68	0.943499
	39	184.61	232.87	1.26142		295.52	1067.19	3.61123		131.68	295.11	2.24111		295.52	3449.88	11.6739		230.64	867.77	3.76244	1047.56	4.54197		211.97	215.61	1.01717
	41	121.8	188.6	1.54844		298.66	965.43	3.23254		96.91	421.78	4.35229		298.66	4186.72	14.0183		200.43	1188.15	5.928	1222.2	6.09789		204.35	214.81	1.05119
	42	162.58	183.03	1.12578		311.39	2582.88	8.29468		124.9	287.2	2.29944		311.39	3817.42	12.2593		236.37	1084.93	4.58996	881.6	3.72975		203.21	196.51	0.967029
	44*	129.93	214.44	1.65043		219.42	1557.14	7.09662		101.28	383.33	3.78485		219.42	4789.05	21.826		172.8	900.7	5.21238	1000.84	5.7919		220.91	226.08	1.0234
	45	182.03	296.43	1.62847		372.23	1890.53	5.07893		122.13	447.18	3.66151		372.23	5727.61	15.3873		346.21	1288.33	3.72124	1278.97	3.6942		212.64	213.97	1.00625
	49	115.7	131.3	1.13483		244.4	752.7	3.07979		80.6	157.3	1.95161		244.4	1801.8	7.37234		170.3	717.6	4.21374	690.3	4.05344		213.2	231.4	1.08537
	56	103.799	175.737	1.69305		258.276	1311.52	5.07798		88.1708	331.759	3.76268		258.276	3732.16	14.4503		206.029	1125.52	5.46292	1225.04	5.94593		137.603	142.814	1.03787
	57	123.329	192.659	1.56215		279.256	980.77	3.51208		91.7238	466.441	5.08528		279.256	4425.09	15.846		152.097	1092.31	7.18165	1097.92	7.21851		208.286	205.743	0.987792
	60	191.023	219.591	1.14955		378.251	2481.56	6.56061		137.715	393.831	2.85975		378.251	3613.94	9.55434		230.058	1427.29	6.20406	1320.72	5.7408		193.65	246.909	1.27503
	62	109.761	163.538	1.48995		305.072	426.95	1.39951		126.912	344.252	2.71252		305.072	4518.08	14.8099		1565.1	5011.85	3.20226	5049.92	3.22659		187.034	200.244	1.07063
	B. Clinical Subtype:t(12;21) translocation
	Study Subject
	5	112.39	201.944	1.79681		202.306	446.448	2.2068		75.6172	273.099	3.6116		Not Done	Not Done	Not Done		296.488	952.092	3.21123	Not Done	Not Done		151.332	155.533	1.02776
	19	93.6	130.8	1.39744		164.4	290.4	1.76642		72	267.6	3.71667		164.4	2071.2	12.5985		153.6	778.8	5.07031	Not Done	Not Done		181.2	182.4	1.00662
	24	137.583	185.65	1.34937		181.573	1475.24	8.12474		77.4756	323.85	4.18003		181.573	4306.89	23.7199		203.911	1091.93	5.35493	1083.71	5.31462		137.221	148.293	1.08068
	28	231.18	167.397	0.724097		257.058	1623.51	6.31575		161.507	434.165	2.68821		257.058	3956.41	15.3911		261.786	854.205	3.26299	1083.02	4.13704		180.362	193.321	1.07185
	31	63.2573	104.2	1.64723		127.759	1372.17	10.7403		53.2011	212.634	3.9968		127.759	2566.48	20.0885		181.032	746.049	4.1211	809.477	4.47147		93.0934	100.662	1.0813
	33	52.27	85.67	1.63899		99.84	1058.15	10.5985		43.3	198.47	4.5836		99.84	2023.66	20.269		112.67	658.56	5.84503	662.94	5.88391		77.88	85.59	1.099
	46§	120.99	180	1.48773		212.29	850.73	4.0074		101.34	390.95	3.85781		212.29	4713.25	22.2019		140.44	859.48	6.11991	899.3	6.40345		218.87	215	0.982318
	51	120.19	249.36	2.07472		255.55	1328.83	5.19988		87.13	431.7	4.95467		255.55	5311.37	20.7841		275.33	1167.93	4.24193	1194.88	4.33981		200.22	195.28	0.975327
	58	159.524	190.884	1.19658		341.72	458.154	1.34073		117.4	249.118	2.12195		341.72	2994.13	8.76194		246.334	940.073	3.81625	884.184	3.58936		215.258	214.155	0.994875
	63	91.6359	166.305	1.81484		223.964	1194.55	5.33365		104.626	416.403	3.97991		223.964	4608.5	20.5769		1184.09	5036.83	4.25376	5479.59	4.62768		210.819	209.505	0.993768
	C. Clinical Subtype:t(1;19) translocation
	Study Subject
	4	130.965	197.256	1.50617		192.526	1188.29	6.17213		79.4817	324.654	4.08464		Not Done	Not Done	Not Done		559.982	1089.07	1.94482	Not Done	Not Done		93.5122	91.8343	0.982057
	17*	136.478	169.66	1.24313		223.785	1140.13	5.09476		124.115	389.857	3.14111		223.785	1411.96	6.30944		165.957	1002.37	6.03994	Not Done	Not Done		174.587	158.596	0.908406
	18	110.4	156	1.41304		180	1905.6	10.5867		84	386.4	4.6		180	3444	19.1333		166.8	1225.2	7.34532	Not Done	Not Done		105.6	129.6	1.22727
	D. Clinical Subtype: Hypodiploidy
	Study Subject
	47†	221.78	336.68	1.51808		306.41	2999.37	9.78875		111.07	485.32	4.3695		306.41	4934.48	16.1042		457.95	1302.66	2.84455	1104.2	2.41118		200.9	215.6	1.07317
	52	142.79	174.23	1.22018		292.13	Not Done	Not Done		94.32	279.03	2.95833		292.13	1625.05	5.56276		226.63	995.6	4.39306	855.43	3.77457		157.2	141.48	0.9
	D. Clinical Subtype: t(9;22) translocation
	Study Subject
	9§	68.88	89.79	1.30357		98.4	392.985	3.99375		66.42	185.73	2.7963		98.4	1929.87	19.6125		81.18	674.04	8.30303	Not Done	Not Done		119.31	125.46	1.05155
	10	151.099	237.86	1.5742		225.543	1269.88	5.6303		82.8725	265.878	3.20828		225.543	3173.01	14.0683		489.169	970.924	1.98484	Not Done	Not Done		173.095	181.585	1.04905
	48†	147.94	239.53	1.6191		233.59	2138.4	9.1545		92.81	388.21	4.18285		233.59	3533.53	15.1271		343.12	873.7	2.54634	894.46	2.60684		213.41	234.08	1.09686
	E. Clinical Subtype: Other‡
	Study Subject
	3*	128.507	198.793	1.54694		166.495	1159.2	6.96234		69.2943	309.707	4.46944		Not Done	Not Done	Not Done		236.176	1223.99	5.18253	Not Done	Not Done		151.134	183.336	1.21307
	8	121.794	199.113	1.63483		259.545	1591.07	6.13023		94.3944	428.991	4.54467		259.545	3616.13	13.9326		220.287	1196.77	5.43275	Not Done	Not Done		108.892	117.352	1.07769
	11	92.3792	144.231	1.56129		214.043	943.737	4.40909		88.9543	329.854	3.70813		214.043	2511.2	11.7322		177.107	954.497	5.38939	Not Done	Not Done		132.848	139.172	1.04761
	13†*§	135.507	154.65	1.14128		225.516	865.096	3.83607		122.329	197.922	1.61795		225.516	1081.09	4.79383		292.673	920.226	3.14421	Not Done	Not Done		217.059	217.048	0.99995
	16*	102.85	209.33	2.03529		203.28	1122.88	5.52381		73.81	465.85	6.31148		203.28	3918.59	19.2768		398.09	1255.98	3.15501	Not Done	Not Done		137.94	148.83	1.07895
	20§	178.038	169.143	0.950041		224.63	486.475	2.16568		106.38	154.609	1.45336		224.63	377.673	1.68131		118.501	234.7	1.98057	Not Done	Not Done		215.707	200.879	0.931259
	21	146.41	200.86	1.3719		307.34	941.38	3.06299		98.01	363	3.7037		307.34	2565.2	8.34646		199.65	1100.49	5.51212	1118.04	5.6		133.1	142.78	1.07273
	22§	172.41	290.976	1.6877		248.318	2917.79	11.7502		106.113	353.776	3.33396		248.318	2028.77	8.17004		181.654	1412.16	7.77387	1342.84	7.39231		293.209	281.793	0.961063
	23	137.459	187.68	1.36535		268.27	477.472	1.77982		77.0143	210.99	2.73963		268.27	733.887	2.73563		128.905	1138.61	8.83299	349.459	2.71098		196.738	185.422	0.942482
	29	102.309	142.558	1.3934		183.951	727.926	3.95717		71.2527	266.756	3.7438		183.951	2532.27	13.766		246.028	524.34	2.13122	790.002	3.21103		126.457	133.385	1.05478
	34	220.44	241.56	1.09581		384.12	902.88	2.35052		145.2	273.24	1.88182		384.12	2836.02	7.38316		293.04	939.84	3.20721	1144.44	3.90541		246.84	261.36	1.05882
	36§	140.82	151.44	1.07542		198.76	1164.46	5.85862		104.05	241.49	2.3209		198.76	1260.19	6.34026		371.6	1146.88	3.08633	559.4	1.50538		166.34	139.97	0.841469
	38*	104.4	173.11	1.65814		207.65	1800.68	8.67171		99.59	425.13	4.2688		207.65	4355.12	20.9734		210.06	1185.61	5.64415	1143.24	5.44245		193.19	211.28	1.09364
	40	134.93	166.37	1.23301		252.83	597.36	2.36269		115.28	381.21	3.30682		252.83	3571.06	14.1244		182.09	924.86	5.07914	1093.85	6.00719		180.78	201.74	1.11594
	43	171.26	246.33	1.43834		354.66	3540.13	9.98176		127.16	395.34	3.109		354.66	3990.35	11.2512		261.66	1206.42	4.61064	1083.85	4.14221		162.53	179.39	1.10373
	50†*	225.06	374.28	1.66302		287.84	464.35	1.61322		86.52	368.25	4.25624		287.84	6337.8	22.0185		760.46	1043.2	1.3718	1005.92	1.32278		276.97	269.63	0.973499
	53	111.282	241.187	2.16736		238.514	2997.36	12.5668		77.8034	360.247	4.63023		238.514	4658.69	19.5321		304.517	941.981	3.09337	919.976	3.0211		254.656	249.594	0.980123
	54	151.762	263.057	1.73336		340.422	3075.84	9.0354		102.402	554.606	5.41599		340.422	5489.55	16.1258		207.106	1310.17	6.32608	1300.98	6.2817		175.277	184.376	1.05191
	55	166.228	251.101	1.51058		553.796	1494.79	2.69917		128.98	431.934	3.34884		553.796	4974.01	8.98167		319.82	1101.17	3.4431	1132.2	3.54013		201.701	200.465	0.993873
	59	140.169	217.429	1.55119		185.987	783.198	4.21104		83.8121	386.433	4.61071		185.987	4383.25	23.5675		1907.1	6242.6	3.27335	6375.2	3.34288		154.524	179.416	1.16109
	61	78.7554	199.141	2.5286		172.436	1577.87	9.15043		67.0751	361.044	5.38268		172.436	4876.23	28.2785		1073.96	4399.74	4.09674	4914.49	4.57604		216.333	202.852	0.937685
	†Deceased
	*Relapsed
	§ Bone marrow sample
	‡ Please refer to Supplementary Table 1 for study subject-specific cytogenetics/FISH data
