# Supplementary figures and images for: Defining the Basal and Immunomodulatory Mediator-Induced Phosphoprotein Signature in Pediatric B Cell Acute Lymphoblastic Leukemia (B-ALL) Diagnostic Samples
Source: MDPI journal article supplement (doi:10.3390/ijms241813937), 2023-09-11

# Supplementary Figure S1

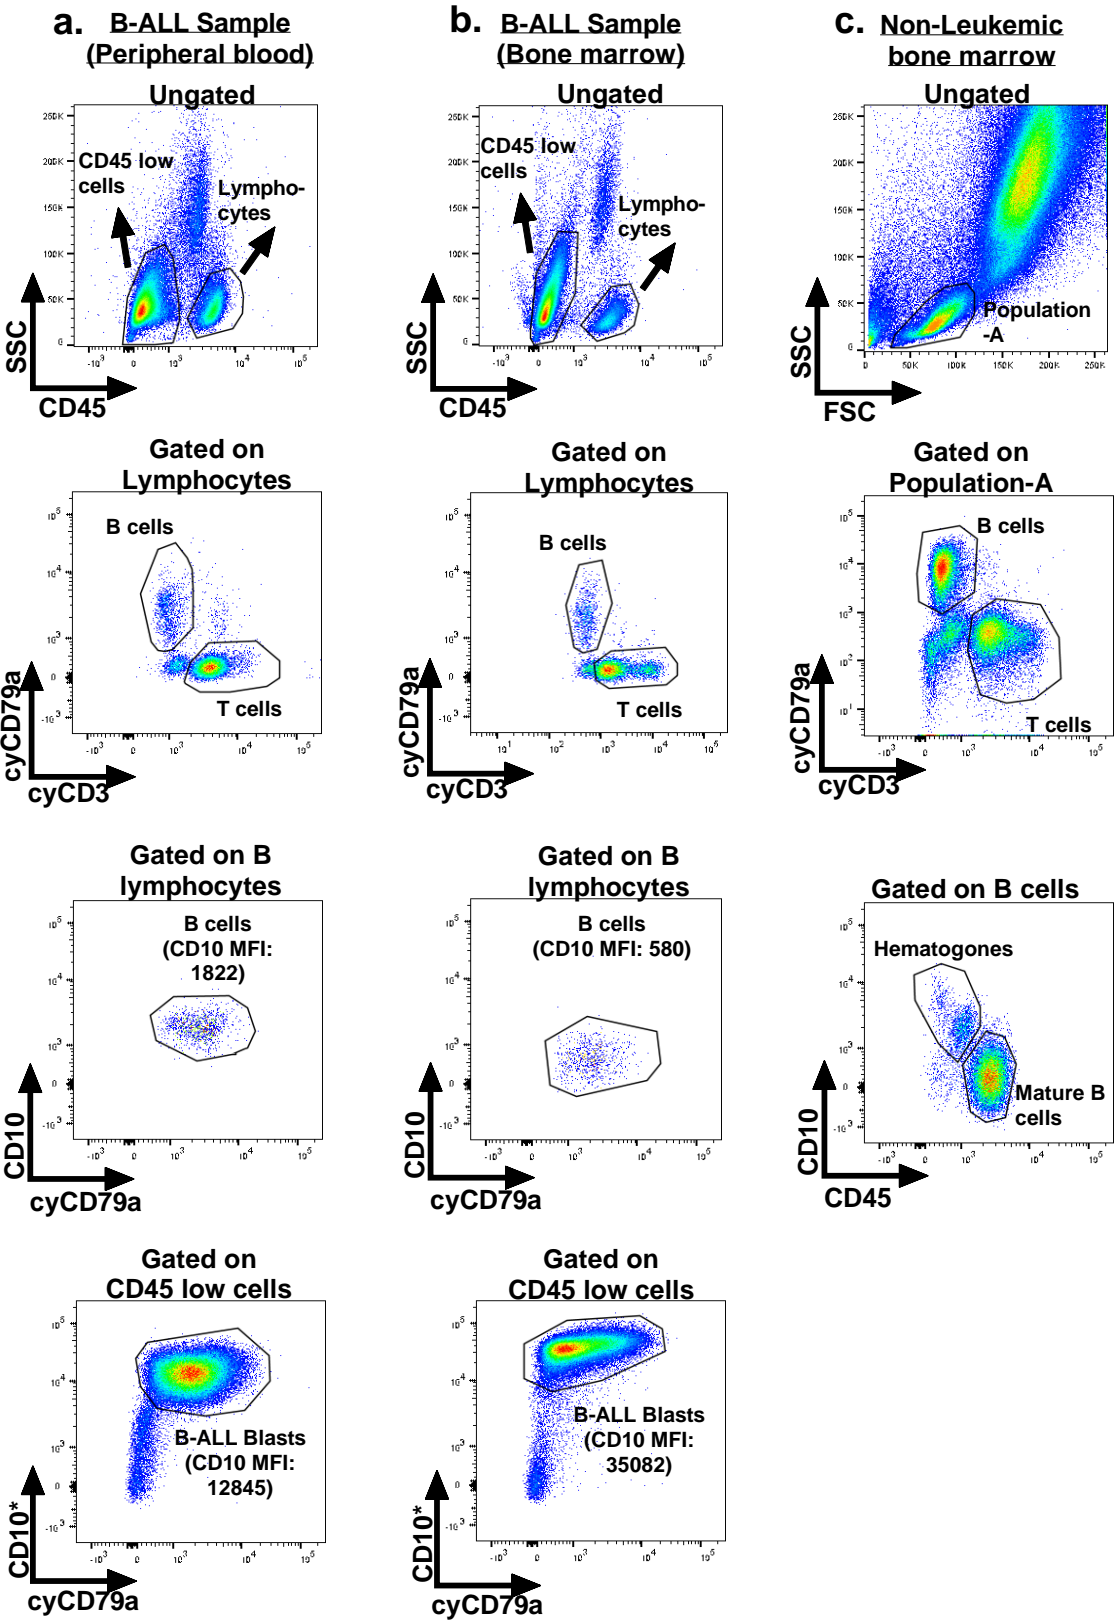

Supplement: s1 [file s1]
